# Supplementary material
Source: PubMed Central journal article supplement (PMC4380551)

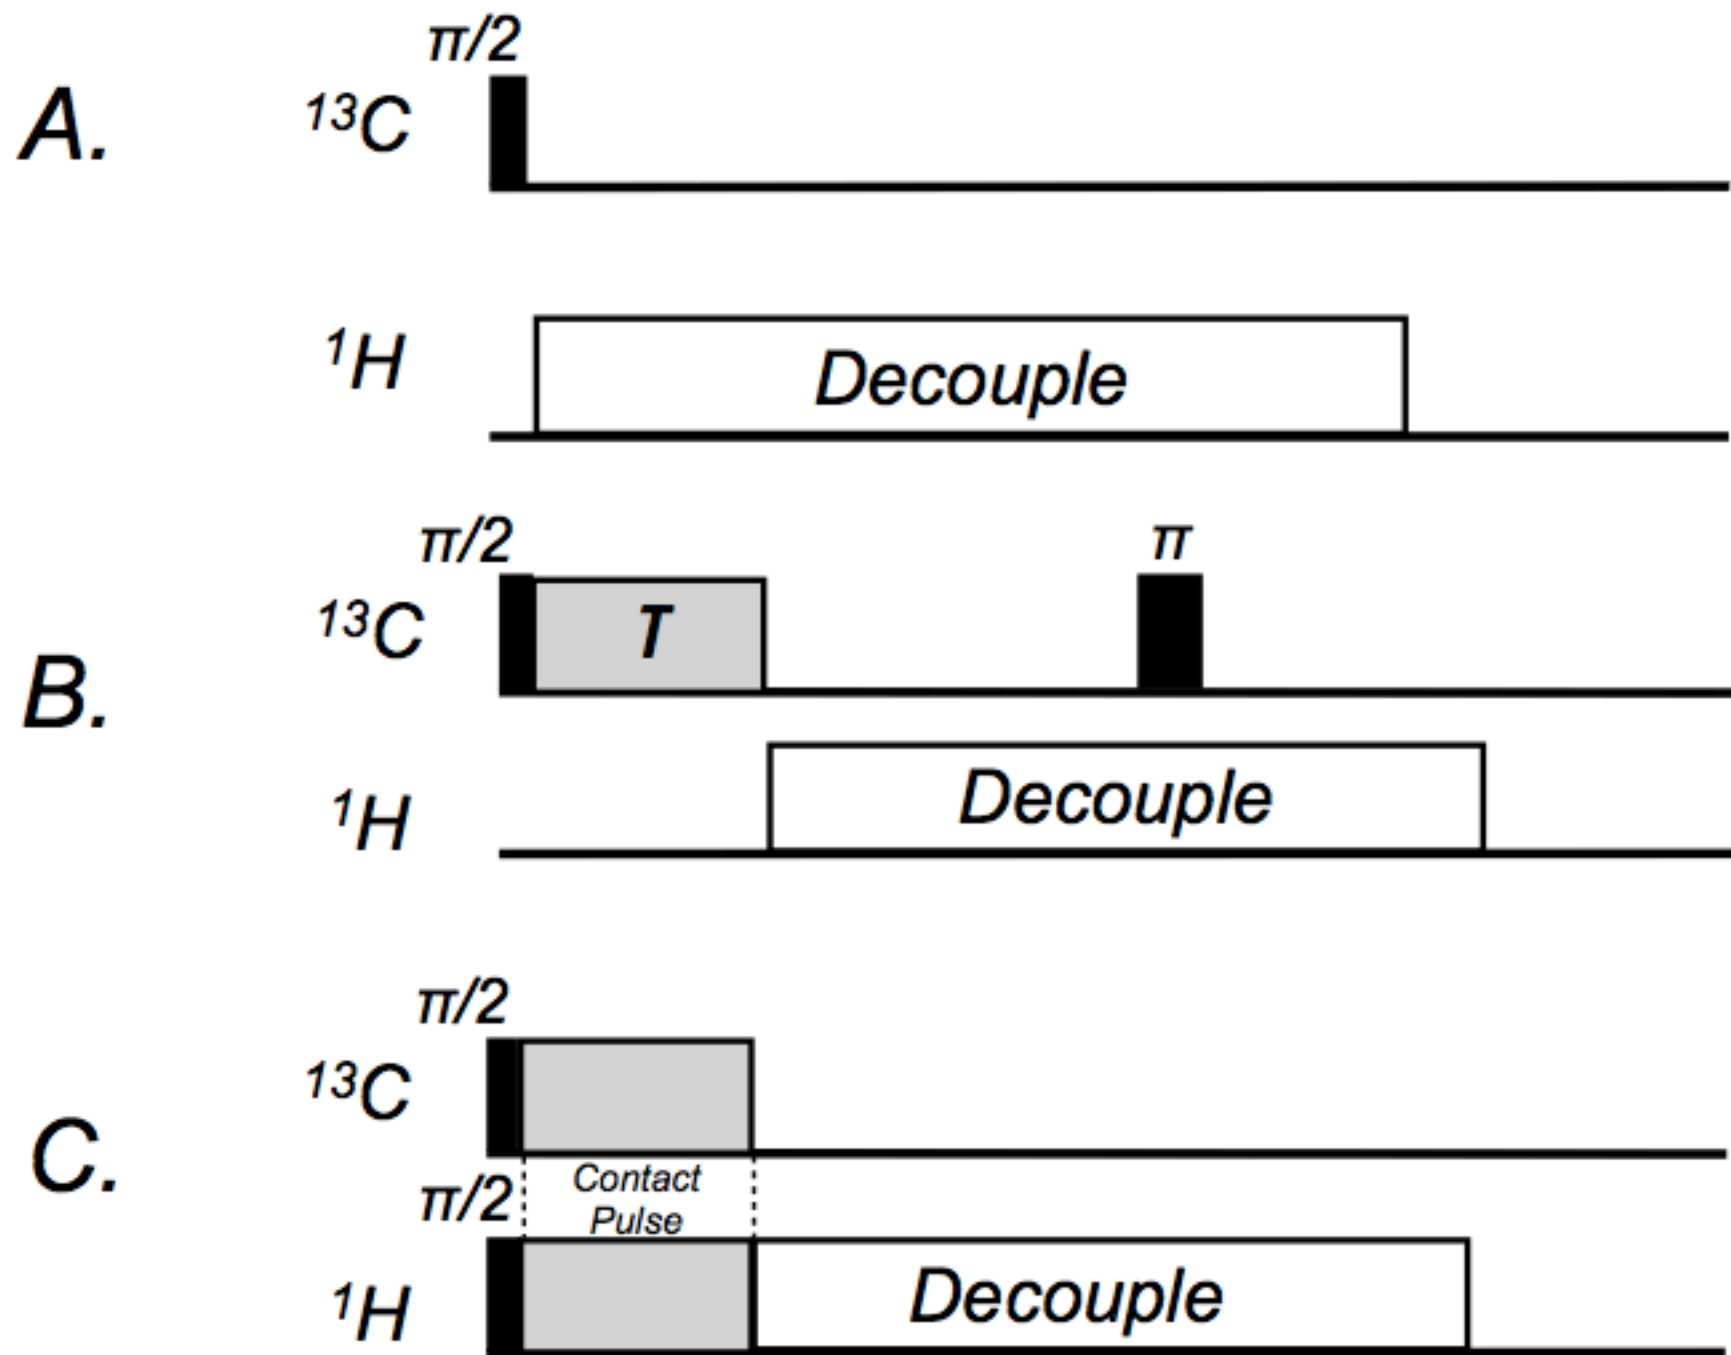

Supplement: NIHMS658476-supplement-1.pdf [file NIHMS658476-supplement-1.pdf]

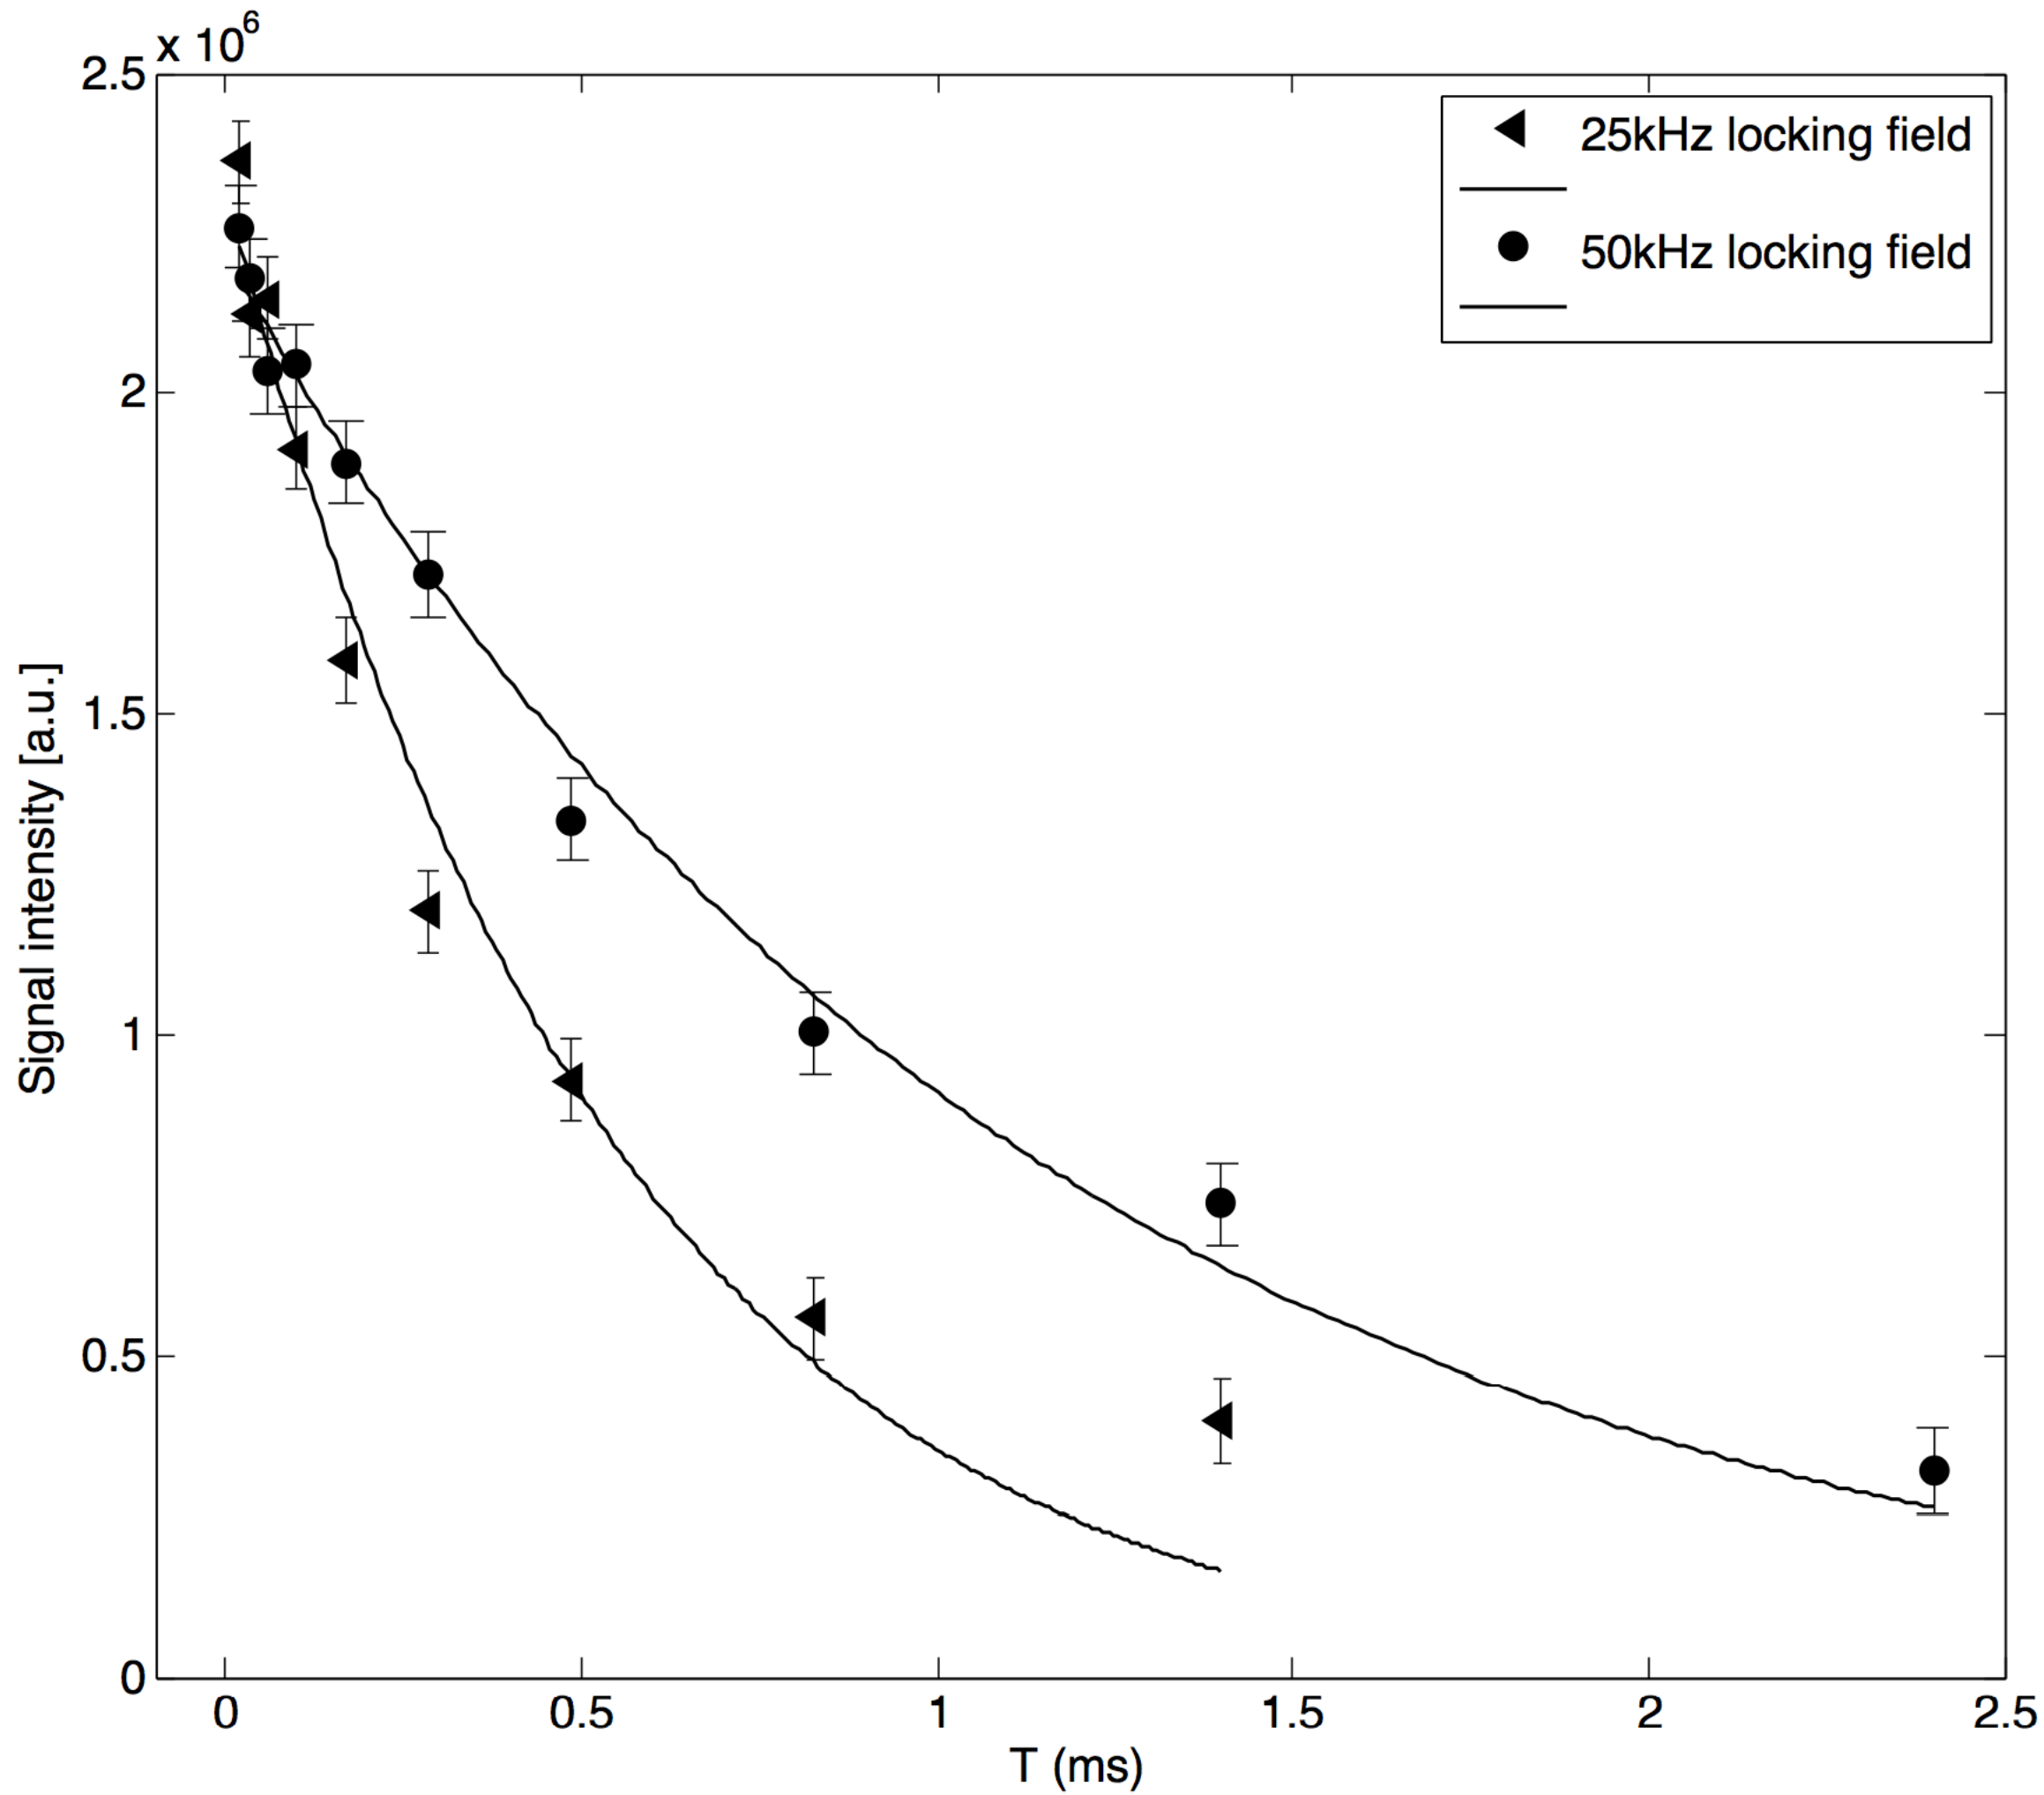

Supplement: NIHMS658476-supplement-2.pdf [file NIHMS658476-supplement-2.pdf]
